1 Tissue-specific and repeat length-dependent somatic instability of the X-linked dystonia parkinsonism-  
2 associated CCCTCT repeat

3  
4 Lindsey N. Campion<sup>1,2#</sup>, Alan Mejia Maza<sup>1,3#</sup>, Rachita Yadav<sup>1,2,3,4</sup>, Ellen B. Penney<sup>1,2</sup>, Micaela G.  
5 Murcar<sup>1,2</sup> Kevin Correia<sup>3</sup>, Tammy Gillis<sup>3</sup>, Cara Fernandez-Cerado<sup>5</sup>, M. Salvie Velasco-Andrada<sup>5</sup>, G. Paul  
6 Legarda<sup>5</sup>, Niecy G. Ganza-Bautista<sup>5</sup>, J. Benedict B. Lagarde<sup>5</sup>, Patrick J. Acuña<sup>1,2,5</sup>, Trisha Multhaupt-  
7 Buell<sup>1,2</sup>, Gabrielle Aldykiewicz<sup>1,2</sup>, Melanie L. Supnet<sup>1,2</sup>, Jan K. De Guzman<sup>5,6</sup>, Criscely Go<sup>6</sup>, Nutan  
8 Sharma<sup>1,2</sup>, Edwin L. Munoz<sup>7</sup>, Mark C. Ang<sup>7</sup>, Cid Czarina E. Diesta<sup>8</sup>, D. Christopher Bragg<sup>1,2</sup>, Laurie J.  
9 Ozelius<sup>1,2\*</sup>, Vanessa C. Wheeler<sup>1,3\*</sup>

10

11 #Equal contribution

12 \*Corresponding authors

13

14 <sup>1</sup>Department of Neurology, Massachusetts General Hospital and Harvard Medical School, Boston, MA,  
15 USA

16 <sup>2</sup>Department of Neurology, The Collaborative Center for X-linked Dystonia-Parkinsonism, Massachusetts  
17 General Hospital, Charlestown, MA, USA

18 <sup>3</sup>Center for Genomic Medicine, Massachusetts General Hospital, Boston, MA, USA

19 <sup>4</sup>Program in Medical and Population Genetics, Broad Institute of MIT and Harvard, Cambridge, MA

20 <sup>5</sup>Sunshine Care Foundation, Roxas City, Capiz, Philippines

21 <sup>6</sup>Department of Neurology, Jose R. Reyes Memorial Medical Center, Metro Manila, Philippines

22 <sup>7</sup>Department of Pathology, College of Medicine, University of the Philippines, Manila, Philippines

23 <sup>8</sup>Department of Neurosciences, Makati Medical Center, Makati, Philippines

24

25

26

27 **Abstract**

28 X-linked dystonia-parkinsonism (XDP) is a progressive adult-onset neurodegenerative disorder caused by  
29 insertion of a SINE-VNTR-Alu (SVA) retrotransposon in the *TAF1* gene. The SVA retrotransposon  
30 contains a CCCTCT hexameric repeat tract of variable length, whose length is inversely correlated with  
31 age at onset. This places XDP in a broader class of repeat expansion diseases, characterized by the  
32 instability of their causative repeat mutations. Here, we observe similar inverse correlations between  
33 CCCTCT repeat length with age at onset and age at death and no obvious correlation with disease  
34 duration. To gain insight into repeat instability in XDP we performed comprehensive quantitative  
35 analyses of somatic instability of the XDP CCCTCT repeat in blood and in seventeen brain regions from  
36 affected males. Our findings reveal repeat length-dependent and expansion-based instability of the XDP  
37 CCCTCT repeat, with greater levels of expansion in brain than in blood. The brain exhibits regional-  
38 specific patterns of instability that are broadly similar across individuals, with cerebellum exhibiting low  
39 instability and cortical regions exhibiting relatively high instability. The spectrum of somatic instability  
40 in the brain includes a high proportion of moderate repeat length changes of up to 5 repeats, as well as  
41 expansions of ~20->100 repeats and contractions of ~20-40 repeats at lower frequencies. Comparison  
42 with *HTT* CAG repeat instability in postmortem Huntington's disease brains reveals similar brain region-  
43 specific profiles, indicating common *trans*-acting factors that contribute to the instability of both repeats.  
44 Analyses in XDP brains of expansion of a different SVA-associated CCCTCT located in the *LIPG* gene,  
45 and not known to be disease-associated, reveals repeat length-dependent expansion at overall lower levels  
46 relative to the XDP CCCTCT repeat, suggesting that expansion propensity may be modified by local  
47 chromatin structure. Together, the data support a role for repeat length-dependent somatic expansion in  
48 the process(es) driving the onset of XDP and prompt further investigation into repeat dynamics and the  
49 relationship to disease.

50

51

52

## 53 **Introduction**

54 X-linked dystonia parkinsonism (XDP, OMIM314250) is a progressive and fatal adult-onset  
55 neurodegenerative disease endemic to the island of Panay, Philippines [1,2]. The clinical phenotype most  
56 commonly described consists of an initial presentation of focal dystonia that spreads to multiple body  
57 regions and combines with, or is replaced by, parkinsonism that predominates 10-15 years after onset  
58 [1,3,4]. The average age of symptom onset is 39-40 years, though the age at onset (AAO) can differ  
59 widely (12 to 64 years) [1,2]. XDP principally affects males, with a frequency of 5.74 cases per 100,000  
60 individuals in Panay, though female carriers are reported to have symptoms in a few cases [1,5]. Limited  
61 neuropathological studies of post mortem XDP patient brain tissue have revealed changes to the  
62 neostriatum that include selective loss of medium-spiny neurons (MSNs) [6–8] as seen in Huntington’s  
63 disease (HD, OMIM 143100) [9]. A handful of neuropathology studies also provides evidence for  
64 pathology outside the neostriatum [10,11]. Neuroimaging has demonstrated neostriatal changes, notably  
65 atrophy of the caudate and putamen [12–16] as well as changes in cortex, cerebellum, brainstem and  
66 globus pallidus [10,12,15].

67 Genetic linkage and refined mapping localized the causal locus of XDP to the X-chromosome  
68 [11,17–19], with recent work characterizing a thirteen-marker haplotype shared by all probands defining a  
69 minimal critical region of 219.7 kb with TATA-binding-protein (TBP)-associated factor-1 (*TAFI*) being  
70 the only gene within this region [20]. Among the thirteen disease-specific variants is a ~2.6 kb SINE-  
71 VNTR-Alu (SVA)-type retrotransposon [21] inserted in intron 32 of *TAFI* [19]. XDP patient tissues and  
72 cell lines exhibit reduced *TAFI* expression [19,20,22–25] as well as aberrant splicing that results in partial  
73 retention of intronic sequence proximal to the SVA insertion [20]. Reduced *TAFI* expression, intron  
74 retention and aberrant splicing can be rescued by excision of the SVA [20,23], suggesting that SVA-  
75 mediated *TAFI* transcriptional dysregulation may contribute to disease pathogenesis. The 5’ end of the  
76 SVA contains a hexameric CCCTCT repeat tract that varies in length from 30 to 55 repeats [4,26].  
77 Notably, repeat length is inversely correlated with AAO, as seen in other disorders caused by expanded  
78 microsatellite repeats [27], suggesting a critical role of CCCTCT repeat length in XDP pathogenesis. The

79 length of the repeat was also associated with transcriptional activity *in vitro* [4] and its length inversely  
80 correlated with *TAFI* expression in patient blood samples [26]. A common characteristic of repeat  
81 expansion disorders is the instability of the disease-associated repeat, both in the germline and in somatic  
82 tissues, where in the latter the repeat tends to expand in a length-dependent and tissue-specific manner  
83 [27–29]. In HD, genetic studies have provided strong evidence that somatic expansion of the *HTT* CAG  
84 repeat drives the rate of disease onset [30–32]. Studies of other repeat expansion diseases indicate that  
85 somatic expansion is a likely common mechanism driving pathogenesis [28,33–36]. Significantly, a  
86 recent genome-wide association study (GWAS) for modifiers of XDP [16] identified genes (*MSH3*,  
87 *PMS2*) with known roles in repeat instability [31,37–39] that also modify HD [31,40], indicating that a  
88 common mechanism at the level of repeat instability extends to XDP. The XDP CCCTCT repeat exhibits  
89 intergenerational instability, with repeat length tending to increase in transmissions from mothers and to  
90 decrease in transmissions from fathers [4,26]. Patient cell lines show limited repeat instability [4,26],  
91 while investigation of a small number of XDP individuals has provided evidence of somatic repeat  
92 expansion in post-mortem brain [26,41].

93 Here, to gain a deeper understanding of somatic instability in XDP we have performed an  
94 extensive quantitative characterization of XDP CCCTCT repeat instability in blood, and in up to 17 brain  
95 regions from 41 XDP individuals. Our findings reveal repeat length- and tissue-dependent CCCTCT  
96 repeat expansion, suggesting that somatic expansion underlies the repeat length-dependent clinical onset  
97 of XDP.

98

## 99 **Materials and Methods**

### 100 **XDP Patients and Sample Collection**

#### 101 ***Blood***

102 Patients recruited for this study included individuals with XDP evaluated at Massachusetts General  
103 Hospital (MGH) (Boston, MA, USA), Jose R. Reyes Memorial Medical Center (JRRMMC) (Manila,

104 Philippines), and regional clinics on the island of Panay (Panay, Philippines). All participants provided  
105 written informed consent, and the study was approved by local Institutional Review Boards (IRBs) at  
106 both MGH and JRRMMC. Patients enrolled were subjected to comprehensive neurological examinations  
107 and blood collection [42]. This study also included archival DNA specimens; collection methods and the  
108 clinical characterization of donor subjects who provided these specimens have been previously described  
109 [18]. Genomic DNA (gDNA) was extracted from blood using the Genra Puregene kit (Qiagen). Enrolled  
110 patients were confirmed to be positive for the XDP mutation by PCR amplification for a known 48 bp  
111 deletion haplotype marker as previously described [4,43]. Blood samples from 266 male XDP patients  
112 with known AAO were evaluated for correlation with repeat length. Somatic instability was analyzed in  
113 164 blood samples, representing a subset of male XDP patients included in the cohort above.

#### 114 ***Brain***

115 Post-mortem brain tissue from XDP patients (n=41; 40 with age at onset and death) was obtained in  
116 collaboration with the Collaborative Center for XDP (CCXDP), at MGH (Boston, MA, USA), Makati  
117 Medical Center (Makati City, Philippines), and the Sunshine Care Foundation (Panay, Philippines).  
118 Detailed descriptions of all methods related to donor consent, brain collection and tissue processing have  
119 been previously reported [44] and the use of XDP patient post-mortem brain tissue and all study  
120 procedures were approved by Institutional Review Boards at Makati Medical Center (Makati City,  
121 Philippines) and MGH (Boston, MA, USA). Genomic DNA was extracted from different brain regions  
122 using the DNeasy Blood and Tissue Kit (Qiagen), according to manufacturer's instructions and with the  
123 following modifications: samples were incubated in buffer ATL and Proteinase K overnight at 56°C;  
124 washes AW1 and AW2 were repeated; DNA was eluted in 100 µl of Qiagen Elution Buffer, preheated to  
125 56°C, applied to the spin columns, and incubated at room temperature for 10 minutes before  
126 centrifugation. The sample was run through the spin column a second time before final centrifugation.  
127 The presence of the XDP mutation in each brain was confirmed as above.

128

## 129 **Determination of XDP and *LIPG* CCCTCT repeat lengths and expansion indices**

130 To determine the length of XDP and *LIPG* SVA CCCTCT repeats in blood and postmortem brain  
131 regions, we used fluorescent PCR-based assays, with the primers and conditions outlined in Additional  
132 File 1: Table S1. Both protocols used 125ng of gDNA per reaction, in a 25  $\mu$ l reaction volume with buffer  
133 and dNTPs provided with the PrimeSTAR GXL polymerase (Takara) according to the manufacturer's  
134 protocol, and as previously described for the XDP repeat [4]. Following PCR, aliquots of each product  
135 were resolved via electrophoresis in agarose gels to confirm amplification of the SVA repeat sequence  
136 and then run on the ABI 3730 DNA sequencer (Applied Biosystems) with GeneScan 500 LIZ as internal  
137 size standard, and the data analyzed using GeneMapper v5 (Applied Biosystems) [4]. Repeat  
138 amplification resulted in a distribution of fragments separated by 6 bp and repeat size was defined as the  
139 tallest peak in this distribution. XDP repeat size was assigned relative to a sequenced control and *LIPG*  
140 repeat size calculated based on fragment length (bp). To quantify XDP and *LIPG* CCCTCT repeat  
141 expansion, we generated an expansion index from the GeneMapper peak height data as previously  
142 described [45], using a 5% relative peak height threshold cut-off (*i.e.* excluding peaks whose height is less  
143 than 5% of the height of the modal allele). Because *LIPG* is autosomal, most individuals had two  
144 distinguishable allele lengths. In many cases, alleles were sufficiently separated to allow quantification of  
145 expansion peaks from each. In some individuals, when the alleles were too close, we only captured the  
146 expansion index from one allele.

147

## 148 **Small pool-PCR Southern blot analyses**

149 1  $\mu$ g of gDNA was digested with HaeIII (37°C for 12 hours) and the enzyme subsequently inactivated at  
150 80°C for 20 minutes. Serial dilutions were made in water to a final concentration of 90 pg/ $\mu$ l and 1  $\mu$ l  
151 (approx. 30 genome equivalents, g.e.) was used for PCR amplification using a non-FAM-labeled version  
152 of the XDP SVA hexamer primers with the small pool-PCR conditions outlined in Additional File 1:  
153 Table S1. For each sample, PCR amplifications of 36 replicates of 90 pg gDNA and 8 DNA-negative

154 PCR controls were carried out in a 25  $\mu$ l reaction volume with buffer and dNTPs provided with the  
155 PrimeSTAR GXL polymerase (Takara) according to the manufacturer's protocol. 10  $\mu$ l of each PCR  
156 product were run in 2% agarose gels alongside digoxigenin (DIG)-labeled size markers VII and VIII  
157 (Roche), for 16 hours at 50 V then transferred to a positively charged nylon membrane (Roche) by  
158 common squash-blotting technique [26,46]. The membrane was hybridized with 5 pmol/ml of a 5' DIG-  
159 labeled (AGAGGG)<sub>10</sub> probe (Sigma) in DIG Easy Hybridization Solution (Sigma) overnight at 45°C and  
160 then washed twice each with 2 X SSC, 0.1 % SDS at room temperature for 5 minutes, 0.1 X SSC, 0.1%  
161 SDS at 68°C for 20 minutes, and 0.1 X SSC, 0.5% SDS at 68°C for 20 minutes. DIG detection was  
162 carried out using the DIG Luminescent Detection system (Sigma) with CPSD substrate according to the  
163 manufacturer's instructions.

164

#### 165 **Single molecule small pool-PCR sizing**

166 1  $\mu$ g gDNA was digested with HaeIII as above and the DNA serially diluted to a range of concentrations  
167 spanning 3 pg/ $\mu$ l to 300 pg/ $\mu$ l corresponding to approximately 0.5-100 diploid g.e/ $\mu$ l, respectively. For  
168 each sample, at least 10 PCR reactions of 1  $\mu$ l DNA inputs were run for each dilution and resolved using  
169 the ABI 3730 DNA Sequencer. Poisson analysis was used to determine empirically for each sample the  
170 concentration of DNA that resulted in single molecule PCR amplification, *i.e.* the concentration that  
171 resulted in ~33% of all DNA input reactions having no product. We then ran, for each sample, at least  
172 three 96-well plates, each consisting of 72 replicates of the optimized single molecule amplifiable DNA  
173 amount, 18 DNA-negative PCR controls, 5 XDP repeat sizing controls, and one empty well for machine  
174 control. PCR conditions for small pool-PCR were as described in Additional File 1: Table S1, and  
175 CCCTCT repeat size was determined as described above. Allele lengths between 330 bp and 560 bp  
176 (about 32-70 repeats) could be accurately determined based on the known repeat sizing controls. For PCR  
177 products falling outside of this range we estimated repeat length based on molecular weight. All peaks

178 with heights  $\geq 150$  were sized, and for each plate we verified that all of the no-DNA input wells were  
179 negative and that at least 1/3 of the DNA input wells were negative.

180

### 181 **HD sample data**

182 In this study we used *HTT* CAG repeat expansion data previously generated and reported from 8  
183 postmortem brain regions from three HD individuals (HD1-3; CAG repeats 43/16, 44/17, 53/19) obtained  
184 from the New York Brain Bank under an approved MGH IRB protocol [29]. The data from a subset of  
185 eight tissues used in this study were chosen because they were identical or as close as possible to the XDP  
186 brain regions from our XDP cohort. Regions compared were: BA9 (HD and XDP), BA17 (HD) and  
187 occipital cortex (XDP), caudate, accumbens and putamen (HD) and caudate (XDP), cerebellum (HD and  
188 XDP), cingulate gyrus (HD and XDP), globus pallidus putamen (HD) and putamen (XDP), hippocampal  
189 formation (HD) and hippocampus (XDP), subthalamic nucleus (HD and XDP), temporal pole (HD and  
190 XDP). For simplicity, in Figure 5c we refer to all the regions according to the XDP labels. Somatic *HTT*  
191 CAG expansion indices were determined for this study using a 5% relative peak height threshold cut-off  
192 for comparison to the 5% threshold XDP CCCTCT expansion indices.

193

### 194 **Statistical analysis**

195 Data analysis and plots were generated using R/RStudio V.1.3. (<https://cran.r-project.org/mirrors.html>).  
196 Linear regression, stacked bars and scatter plots were generated using ggplot2 package  
197 (<https://www.rdocumentation.org/packages/ggplot2/versions/3.3.5>). Pearson or Spearman coefficients  
198 were determined using ggscatter package and used as appropriate when data distribution was Normal or  
199 not, respectively. The heatmap was generated from a scaled dataset using the heatmaply package followed  
200 by a clusterization method, based on Manhattan distance [https://cran.r-](https://cran.r-project.org/web/packages/heatmaply/vignettes/heatmaply.html)  
201 [project.org/web/packages/heatmaply/vignettes/heatmaply.html](https://cran.r-project.org/web/packages/heatmaply/vignettes/heatmaply.html) . Multiple pairwise comparison test was  
202 performed using Wilcoxon rank-sum test followed by Bonferroni Post Hoc method for *P*-value



203 adjustment.  $X^2$  test was used to compare the numbers of events from single molecule SP-PCR data across  
204 brain tissues.  $P$ -value  $< 0.05$  was considered significant.

205

206

## 207 **Results**

### 208 **XDP CCCTCT repeat length inversely correlates with ages at onset and death but not with disease**

#### 209 **duration**

210 We previously demonstrated in a cohort of 140 XDP males that CCCTCT repeat length in blood was  
211 inversely correlated with AAO [4]. This observation was subsequently confirmed in an independent  
212 cohort of 295 individuals [26]. Here, we have used an expanded dataset from our original sample of 140  
213 comprising blood ( $n=266$ ) and brain ( $n=40$ ) DNA samples from clinically confirmed male XDP patients  
214 to examine further the relationship between CCCTCT repeat length and AAO, as well as age at death  
215 (AAD) and disease duration, defined as AAD minus AAO (Fig. 1). In these analyses, brain repeat length  
216 was determined in 40 postmortem samples with AAO ( $n=39$  in cerebellum and  $n=1$  in occipital cortex  
217 where cerebellum was not available). Both blood and brain tissue were available for 21 individuals; of  
218 these, blood and brain (cerebellar) repeat lengths were identical in 17 individuals and differed by one  
219 repeat in 4 individuals (17-012, 19-017, 19-021, 21-031; Additional file 1: Table S2). Mean ( $\pm$ SD) repeat  
220 lengths in blood and brain were  $41.6 \pm 3.9$  (range:34-53) and  $41.8 \pm 4.6$  (range:34-55), respectively. Mean  
221 ( $\pm$ SD) AAO of the blood and brain samples were  $41.4 \pm 8.3$  (range:18-65) and  $41.4 \pm 8.7$  (range:26-59)  
222 years, respectively. Blood repeat length inversely correlated with AAO and explained  $\sim 45\%$  of the AAO  
223 variability ( $P=7.7e-36$ ; Fig. 1a, red dots), consistent with previous studies [4,16,26]. A similar correlation  
224 was observed between brain repeat length and AAO, with repeat length explaining  $\sim 55\%$  of the AAO  
225 variability ( $P=4.7e-08$ ; Fig. 1a, blue dots). There was no difference in AAO-repeat length correlation  
226 between individuals exhibiting primarily dystonia at onset ( $N=194$ ) and those exhibiting primarily  
227 parkinsonism at onset ( $N=43$ ) (Additional file 2: Fig.S1), consistent with previous observations [26]. Both  
228 AAO and AAD was available for 68 individuals, 28 of whom had blood repeat sizing and 40 of whom

229 had brain repeat sizing. As repeat length was largely identical between brain and blood for the individuals  
230 with both measures, we used a combined blood and brain dataset from these 68 individuals to examine  
231 relationships between repeat length and AAO, AAD or duration (Fig1. b-d). Mean ( $\pm$ SD) repeat length in  
232 these 68 individuals was  $41.6 \pm 4.4$  (range:34-55), mean ( $\pm$ SD) AAO was  $41.7 \pm 4.4$  (range:26-64), and  
233 mean ( $\pm$ SD) AAD was  $50.7 \pm 9.5$  (range:30-69) years. Repeat length inversely correlated with AAO and  
234 AAD, explaining  $\sim 53\%$  ( $P=2.3e-12$ ) and  $\sim 42\%$  ( $P=2.5e-09$ ) of the AAO and AAD variability,  
235 respectively (Fig. 1b-c). In contrast, we found no significant correlation between repeat length and disease  
236 duration (AAD-AAO) (Fig. 1d). These data indicate that the length of the CCCTCT repeat is critical for  
237 process(es) driving XDP onset and death that ensues, though has no obvious effect or a weaker effect on  
238 duration.

239

#### 240 **The XDP CCCTCT repeat exhibits tissue- and repeat length-dependent somatic expansion**

241 The variation in repeat length between individuals reflects the instability of the CCCTCT repeat in  
242 germline transmissions [4,26]. To gain insight into CCCTCT repeat instability in somatic tissues we have  
243 examined repeat length variation in blood ( $n=164$ ) and postmortem brain ( $n=41$ ) from affected males. In  
244 the brain, we analyzed between 1 and 17 brain regions in 41 individuals, including cerebellum only in 17  
245 individuals and occipital cortex only in one individual (Additional File 1: Table S3). The XDP CCCTCT  
246 repeat was PCR-amplified using a previously established genotyping assay for repeat sizing [4]. PCR  
247 amplification of the repeat results in a distribution of fragment sizes, with repeat length determined as the  
248 modal allele in the distribution. Of the 23 postmortem samples in which multiple brain regions were  
249 analyzed, 4 (17-012, 17-17, 19-017 and 21-031) exhibited variation by one repeat unit (Additional File 2:  
250 Fig. S2) while in 19 individuals the modal repeat length was identical in all brain regions analyzed.  
251 Therefore, XDP CCCTCT repeat instability is not substantially reflected in differences in modal repeat  
252 length of the repeat-containing PCR amplicons.

253 We then analyzed XDP CCCTCT instability by quantifying an expansion index from repeat  
254 length distributions of GeneMapper outputs of the repeat-containing PCR products [45]. This relatively

255 high throughput method is sensitive to subtle differences in repeat instability that are captured in the  
256 majority of alleles. Examples of GeneMapper traces from different tissues are shown in Additional File 2:  
257 Fig. S3. The peaks to the left of the modal allele are largely due to PCR slippage, and therefore we  
258 quantified only the expansion peaks to the right of the modal allele. These peaks are variable between  
259 tissues and are the result of somatic repeat length variation. Expansion indices in blood and brain regions  
260 are shown in Fig. 2a, ordered from left to right by the median expansion index per tissue. Very low levels  
261 of XDP CCCTCT expansion were detected in blood (median expansion index = 0.19, interquartile range  
262 [IQR]= 0.22). In contrast, all brain regions exhibited expansion indices that were significantly greater  
263 than those in blood ( $P<0.05$ : Wilcoxon rank-sum tests with Bonferroni correction; Additional File 1:  
264 Table S4). Of the brain regions analyzed, cerebellum had the lowest expansion index (median expansion  
265 index = 0.77, interquartile range [IQR]= 0.32), while occipital cortex exhibited the highest expansion  
266 index (median expansion index = 1.59, interquartile range [IQR]= 0.7). Replicate PCR amplifications  
267 from the same DNA samples demonstrated that differences between brain regions are not due to technical  
268 variation (Additional File 2: Fig. S4). Statistically significant differences in expansion indices ( $P<0.05$ :  
269 Wilcoxon rank sum tests with Bonferroni correction) were observed between some of the brain regions,  
270 most notably in comparisons with cerebellum or occipital cortex (Additional File 1: Table S4). Overall,  
271 there appeared to be a tendency towards higher expansion indices in cortical regions (cingulate gyrus,  
272 prefrontal cortex (BA9), parietal cortex, insula, temporal pole and occipital cortex) than subcortical areas  
273 (cerebellum, caudate, substantia nigra, inferior olivary nucleus, red nucleus, medial thalamus,  
274 hippocampus, putamen, lateral thalamus, deep cerebellar nuclei, sub-thalamic nucleus). Of the subcortical  
275 structures, there was no obvious distinction in expansion indices between forebrain (caudate, putamen,  
276 hippocampus, thalamus, subthalamic nucleus), midbrain (red nucleus) or hindbrain (deep cerebellar  
277 nuclei, inferior olivary nucleus) regions, with the exception of cerebellum (Fig. 2a). Due to the  
278 considerable variation in repeat expansion between individuals, we further evaluated tissue patterns of  
279 expansion by performing hierarchical clustering on a heatmap plot based on scaled expansion index  
280 values (Fig. 2b). The heatmap revealed similar patterns of brain region-specific expansion across

281 individuals and distinguished two major clusters comprised of cortical and subcortical brain areas (Fig.  
282 2b).

283 As individuals differ in their repeat length, we investigated the extent to which repeat length  
284 might explain the variation in expansion index within any one tissue (Fig. 2c). Overall, the data showed  
285 positive correlations between expansion index and repeat length that were statistically significant in a  
286 subset of the tissues (blood, cerebellum, subthalamic nuclei, cingulate gyrus, temporal pole, occipital  
287 cortex). The proportion of the variation in expansion index explained by repeat length varied from 2% in  
288 blood to 45% in the red nucleus. The cerebellum exhibited the most significant correlation ( $P=6.8 \times 10^{-6}$ ),  
289 with repeat length explaining 37% of the expansion index variation. The various strengths of the  
290 associations with repeat length likely differ as a function of sample number, the magnitude of the  
291 instability, and the cell type heterogeneity in each tissue piece that is sampled. *e.g.* blood shows minimal  
292 repeat expansion, limiting the sensitivity to detect biological variation. In cerebellum, the relatively strong  
293 association with repeat length is likely contributed by both cell type homogeneity - 99% of all cerebellar  
294 neurons are granule cells - and the greater number of cerebellar samples relative to the other brain  
295 regions.

296 Together, these data demonstrate greater somatic expansion of the XDP CCCTCT repeat in the  
297 brain than in blood as well as brain region-specific propensities for expansion that are similar across  
298 individuals. Significantly, we show that somatic CCCTCT expansion is dependent on repeat length,  
299 consistent with a contribution of somatic expansion to the onset of disease.

300

### 301 **The XDP CCCTCT repeat exhibits large repeat length changes and expansion-biased instability in** 302 **the brain**

303 Analysis of repeat instability in fragment sizing data obtained from PCR-amplified “bulk” genomic DNA,  
304 as above, is limited by the lack of sensitivity to detect rare alleles and an upper limit for accurate fragment  
305 sizing of ~330-560 base pairs, equating to ~ 32-70 CCCTCT repeats. Further, while allele length  
306 distributions can be quantified in the PCR products, as with the expansion index metric, this may not

307 accurately reflect the distribution of allele lengths present in genomic DNA due to contraction bias  
308 inherent to the PCR. Therefore, to investigate more fully the spectrum of repeat length mosaicism in XDP  
309 brains we employed two small pool-PCR (SP-PCR) approaches, providing the sensitivity to detect rare  
310 somatic events and to quantify allele size distributions. We analyzed a subset of the brain tissues,  
311 sampling across regions (occipital cortex, caudate, putamen, cerebellum) exhibiting a range of  
312 instabilities as determined from the GeneMapper-based analysis above, and across individuals with a  
313 range of repeat lengths (17-17: 54/55 repeats, 19-008: 41 repeats, 18-006: 35 repeats; Fig. 3, Table 1).

314 We first performed SP-PCR in conjunction with Southern blot detection, diluting the genomic  
315 DNA to approximately 30 genome equivalents (g.e) prior to PCR amplification of the CCCTCT repeat.  
316 Examples of the Southern blots are shown in Fig. 3a and a summary of the data is provided in Fig. 3b and  
317 Table 1, the latter indicating the approximate highest and lowest repeat lengths detectable for each  
318 sample. The approximate length ranges for the greatest density of signal on the Southern blots  
319 encompassed the repeat sizes determined by standard genotyping (Fig. 3b, Table 1). Notably, all samples  
320 showed distinct additional bands reflecting expansions or contractions, with a bias towards expansions.  
321 The largest alleles detected across all samples ranged from ~77 to ~149 repeats with increases in length  
322 relative to those determined by standard genotyping ranging from ~27 to >100 units (Table 1). The  
323 smallest alleles detected ranged from ~22 to ~42 repeats, representing ~13-24 unit decreases relative to  
324 genotyped repeat lengths. The highest and lowest approximate repeat lengths detected were found in 18-  
325 006 occipital cortex (149 and 22, respectively) despite this sample having the shortest genotyped repeat  
326 and smallest expansion index (Table 1). Among the different tissues from individual 17-17 (54 repeats),  
327 occipital cortex exhibited the most instability, with repeats ranging from 36 to 129. Cerebellum was the  
328 most stable of these tissues, but nevertheless did show evidence for alleles ranging from 31 to as high as  
329 82 repeats. Caudate and putamen exhibited degrees of mosaicism between those of occipital cortex and  
330 cerebellum. In occipital cortex from 19-008 (41 repeats) we detected a range of repeat lengths from 31-  
331 77. In general, qualitative patterns of instability observed on the Southern blots approximately parallel

332 quantitative differences in expansion indices (Table 1, Fig. 3) but highlight the occurrence of rarer  
333 somatic events that are not detected in the bulk PCR-based analyses.

334 While the SP-PCR Southern blot analyses allow detection of large repeat length changes, input  
335 DNA amounts of multiple genomes do not allow for quantitative analyses of repeat length distributions in  
336 these samples as signals from individual amplification products are not necessarily distinguishable. To  
337 quantify repeat length distributions, we therefore performed SP-PCR of single input molecules. We  
338 targeted ~120-240 individual molecules per sample (Table 1) with the aim of capturing somatic events  
339 that occurred at a frequency of ~0.5-1%, and sized individual PCR products on the ABI sequencer to  
340 achieve single repeat resolution. It should be noted that fragment sizing of SP-PCR products has the same  
341 sizing limitations as bulk PCR and thus we were not able to assess the very large rare expansions that  
342 were seen on Southern blots. We examined the same brain samples as for the Southern blot-based  
343 analyses and extended the single molecule analyses to include putamen, caudate, cerebellum in addition  
344 to occipital cortex from 19-008 (Table 1, Fig.4 and Additional File 1: Table S5). These data revealed a  
345 high proportion of alleles with lengths either expanded or contracted relative to the modal repeat length  
346 (Fig.4b). Note that the modal repeat length in the single molecule input SP-PCR data was identical to the  
347 repeat length determined by standard genotyping of bulk genomic DNA with the exception of 17-17  
348 cerebellum where SP-PCR modal allele was greater by one repeat (Table 1). Across these samples 65% to  
349 84% (mean 74%) of alleles deviated from the modal allele length. The frequency of expansions ranged  
350 from 30% to 58% (mean 49%) while the frequency of contractions was lower overall, ranging from 16%  
351 to 45% (mean 26%) (Fig.4a, Table S5). The relative frequencies of contracted, modal and expanded  
352 alleles differed across the four brain regions of individual 17-17 ( $\chi^2=33.30$ ,  $df=6$ ,  $P<0.0001$ ) with a  
353 relatively high proportion of expansions in occipital cortex and a relatively low proportion of expansions  
354 in cerebellum. Relative frequencies of contracted, modal and expanded alleles were not significantly  
355 different between the four brain regions of individual 19-008 ( $\chi^2=8.882$ ,  $df=6$ ,  $P=0.1803$ ) but differed  
356 significantly between occipital cortices of the three individuals ( $\chi^2=12.52$ ,  $df=4$ ,  $P=0.0139$ ). The  
357 majority of the expanded alleles were 1-4 repeat units, with expansions of 5 or more repeats occurring in

358 2%-18% of alleles (mean 9%) and expansions of 20 or more repeats occurring in 0%-12% of alleles  
359 (mean 2%) (Additional File 1: Table S5). The majority of the contracted alleles were also in the range of  
360 1-4 units, with contractions of 5 or more repeats in 0-11% of alleles (mean 3%) and contractions of 20 or  
361 more repeats in 0-3% of alleles (mean 0.8%) (Table S5). Overall, the allele size distributions in the single  
362 molecule data capture both the tissue-specific and individual-specific differences in instability that are  
363 similarly reflected in the expansion index measure and SP-PCR Southern blot analyses.

364

### 365 **Features of XDP CCCTCT somatic expansion are shared among other microsatellite repeats**

366 To gain additional insight into XDP CCCTCT repeat dynamics we were interested in exploring overlaps  
367 with other microsatellite repeats, in particular: 1) a different CCCTCT repeat, and 2) the unstable  
368 expanded *HTT* CAG repeat due to shared genetic and pathological features of HD and XDP. No other  
369 disease-causing CCCTCT repeats have been described to date, however CCCTCT repeats are common  
370 elements of SVA retrotransposons in the human genome [21]. To identify another CCCTCT repeat to  
371 study in comparison to the XDP repeat, we defined inclusion criteria as: 1) the repeat is similar in length  
372 to the XDP repeat (~35-50) and 2) the repeat-containing SVA is located in an intron and inserted in  
373 reverse orientation relative to the gene transcript, as it is for the XDP SVA. We thus identified a CCCTCT  
374 repeat of 39 units in the reference genome (hg19 chr18:47105372-47105605) within an SVA inserted in  
375 reverse orientation in intron 5 of the endothelial lipase G gene (*LIPG*), hereafter referred to as the *LIPG*  
376 CCCTCT repeat. We first PCR-amplified the *LIPG* CCCTCT repeat from a subset of XDP patient  
377 cerebellar DNAs. Repeat length varied from 39 to 71 (median=53, IQR=10), with two repeat lengths  
378 distinguishable in some individuals and only one in others (Table S6). We then identified six individuals  
379 for analyses of *LIPG* CCCTCT repeat instability across brain regions (cerebellum, caudate, hippocampus,  
380 BA9, temporal pole and occipital cortex) that exhibited a range of XDP CCCTCT expansion levels. The  
381 six individuals were selected based both on tissue availability and having two *LIPG* CCCTCT repeat  
382 lengths sufficiently well-separated to allow quantification of an expansion index from each allele  
383 (Additional File 1: Table S6). Examples of GeneMapper outputs of *LIPG* CCCTCT repeat-containing

384 PCR products are shown in Additional File 2: Fig.S5. Quantification of an expansion index across all the  
385 brain samples (Fig. 5a) revealed the lowest expansion index in cerebellum (median=0.12, IQR=0.06), and  
386 the highest expansion index in caudate (median=0.95, IQR= 0.5), with significantly lower cerebellar  
387 expansion indices relative to other brain regions ( $P<0.05$ : Wilcoxon rank-sum tests with Bonferroni  
388 correction, Additional File 1: Table S7). A comparison of *LIPG* and XDP CCCTCT expansion indices  
389 (Fig.5a) revealed significantly lower values for cerebellum, hippocampus, BA9, temporal pole and  
390 occipital cortex brain regions despite the *LIPG* having longer repeats on average than the XDP repeat  
391 ( $P<0.05$ : Wilcoxon rank-sum test, Additional File 1: Table S7). *LIPG* CCCTCT expansion indices also  
392 positively correlated with repeat length with the proportion of the variation in expansion index explained  
393 by repeat length varying from 54% in caudate to 69% in the temporal pole (Fig. 5b). It is worth noting  
394 that the variability in expansion index as a function of repeat length ( $R^2$ ) may be overestimated in these  
395 data due to the inclusion of two alleles from the same individual. Overall, despite the small sample size  
396 and lower absolute levels of expansion of the *LIPG* repeat compared to the XDP repeat, these data reveal  
397 that both repeats share properties of length-dependent expansion being relatively low in cerebellum.

398 We previously reported, using similar quantitative analyses, tissue-specific patterns of somatic  
399 expansion of the *HTT* CAG repeat in HD postmortem brains [29]. To compare tissue-specific instability  
400 of the XDP CCCTCT and *HTT* CAG repeats, we plotted mean expansion indices across all patient  
401 samples for nine brain regions (BA9, cerebellum, hippocampal formation, temporal pole, putamen,  
402 occipital cortex, subthalamic nuclei and caudate) that were shared across the HD study and this XDP  
403 study (see Materials and Methods). We found that XDP and *HTT* repeat expansion indices in XDP and  
404 HD patient brain tissues, respectively, were highly correlated (correlation coefficient  $r=0.65$ ,  $P=0.0057$ ,  
405 Fig. 5c), indicating shared tissue-specific expansion propensities of these two different disease-associated  
406 repeats. In contrast, and as indicated in Fig.5a, the XDP and *LIPG* expansion indices are not correlated  
407 across the six tissues analyzed (correlation coefficient  $r=0.14$ ,  $P=0.79$ ).

408

409



## 410 **Discussion**

411 Previous studies have shown that the length of the XDP-associated CCCTCT repeat in blood is inversely  
412 correlated with AAO, accounting for ~50% of the AAO variance [4,26]. There is also evidence for  
413 correlations between repeat length and other clinical disease measures [26]. The present study supports  
414 and extends these data; in our expanded blood dataset (N=266), repeat length accounted for ~46% of the  
415 variance in AAO, and in as few as 40 individuals we detected a significant correlation between AAO and  
416 repeat length measured in brain DNA ( $R^2=0.55$ ). The different  $R^2$  values between the various studies and  
417 our cohorts [26,47] may in part be explained by differences in the accuracy in determining AAO and  
418 warrants additional investigation. In addition, in a subset of individuals with known AAO and AAD we  
419 show for the first time that repeat length is inversely correlated with AAD, with a relationship paralleling  
420 that between repeat length and AAO. In contrast, we observed no significant correlation between repeat  
421 length and disease duration (the time between onset and death), an observation previously reported in HD  
422 [48]. However, this does not preclude a possible stronger effect of repeat length on duration that is  
423 counterbalanced by an effect of AAO [49] (*i.e.* longer repeat length resulting in a shorter duration,  
424 counterbalanced by longer repeat length resulting in earlier AAO and subsequent longer duration). As  
425 AAD was only available for 68 individuals in this study, additional patient data will be needed for further  
426 dissection of repeat length-dependent relationships with disease duration. Importantly, our data  
427 underscore the importance of CCCTCT repeat length in driving the rate of XDP, motivating the  
428 investigation of the instability of this repeat tract in somatic cells in patients.

429 To gain insight into the somatic instability of the XDP-associated CCCTCT repeat we have used  
430 multiple methodologies, including single molecule-based analyses, to probe the spectrum of repeat length  
431 mosaicism in blood and across seventeen brain regions from XDP patients. We demonstrate that the XDP  
432 CCCTCT repeat exhibits extensive somatic mosaicism, notably length-dependent and tissue-specific  
433 expansion that is measurable in the bulk of alleles, and the presence of rarer alleles in the brain that can be  
434 either substantially contracted or expanded on the order of  $\sim 10s > 100$  repeats relative to the repeat length  
435 determined using standard genotyping. Given the inverse correlation of CCCTCT repeat length with AAO

436 these observations implicate somatic expansion as a driver of the rate of onset of XDP. Notably, a GWAS  
437 identified two genes, *MSH3* and *PMS2* as modifiers of the age of onset of XDP [16]. These genes are also  
438 modifiers of HD age at onset [31] and encode DNA mismatch repair proteins that modulate the somatic  
439 instability of disease-associated trinucleotide repeats, including the *HTT* CAG repeat [31,37–39]. It is  
440 likely, therefore, that *MSH3* and *PMS2* modify XDP onset by altering the rate of somatic CCCTCT  
441 expansion.

442 We find greater levels of somatic expansion in all brain regions analyzed relative to levels in  
443 blood, supporting recent observations in two XDP patients [41]. Within the brain, we observe region-  
444 specific differences in the degree of repeat expansion that are reflected across the different XDP  
445 individuals, with cerebellum exhibiting the most stability and cortical structures tending to be the most  
446 unstable. Several other disease-associated microsatellite repeats are relatively stable in cerebellum  
447 [29,50,51]. Here, we show substantial correlation between brain region-specific levels of expansion of the  
448 XDP CCCTCT repeat and the *HTT* CAG repeat, as previously observed in a similar comparison between  
449 expansion of the *HTT* CAG repeat and of the *ATXN1* CAG repeat underlying spinocerebellar ataxia type 1  
450 (SCA1) [29]. These data provide support for common proteins (*trans*-acting factors) that modify tissue-  
451 specific levels of somatic expansion of both the XDP and *HTT* repeats, as well as other disease-associated  
452 repeats. We also found that the SVA-associated CCCTCT repeat within the *LIPG* gene, not known to be  
453 associated with any disease, exhibited repeat length-dependent expansion that was low in cerebellum  
454 compared to other brain regions analyzed. Interestingly, the *LIPG* CCCTCT repeat exhibited less  
455 instability than the XDP CCCTCT repeat in most of the brain regions analyzed, despite its relatively  
456 longer repeat lengths, pointing to potential modification of CCCTCT repeat instability *in cis*. It is  
457 plausible that local chromatin structure at the *TAF1* SVA locus might predispose the CCCTCT repeat to  
458 expand, while at the *LIPG* SVA locus, expansion of the CCCTCT repeat is comparatively suppressed. In  
459 line with this idea, disease-associated short tandem repeats were found to be enriched at 3D chromatin  
460 boundaries; in contrast, matched non-disease-associated repeats did not exhibit such an enrichment [52].  
461 Thus, insights into chromatin structural features at the XDP SVA locus relative to other non-disease

462 associated SVAs may provide clues to the instability propensity of its CCCTCT repeat tract. We  
463 previously reported the high G-quadruplex-forming potential of the reverse orientation AGAGGG repeat  
464 in the XDP SVA sequence [4]; whether this plays a role in its repeat instability remains to be investigated.  
465 The *LIPG* gene is also expressed at low levels in brain tissues. Transcription has been proposed to play a  
466 role in promoting repeat instability [53], and therefore a low rate of transcription through the *LIPG* gene  
467 may contribute to the lower level of instability of the SVA-associated CCCTCT repeat within this gene.

468 Our analyses of repeat instability in different brain tissues do not immediately point to any clear  
469 correlation with brain regions implicated either through neuropathological or neuroimaging studies to be  
470 susceptible in XDP [10–16]. *e.g.* neuropathological changes have been described in tissues that include  
471 caudate, putamen, cortex and cerebellum [10], yet these regions encompass both the lowest (cerebellum)  
472 and highest (cortex) levels of expansion. However, the association of repeat instability and cellular  
473 vulnerability is currently challenging due to: 1) the lack of cell type-specific resolution of repeat  
474 instability; 2) limited XDP neuropathology data; 3) neurodegeneration, notably of MSNs [6–8]. In HD,  
475 GWAS studies have provided support for a two-step model of pathogenesis that depends both on the rate  
476 of somatic CAG expansion and repeat length threshold(s) needed to trigger a toxic process(es) [31]. Both  
477 the rate of repeat expansion and toxicity-eliciting threshold may differ by cell type, and as both instability  
478 and toxicity components are needed for pathogenesis, high levels of expansion do not necessarily predict  
479 cellular vulnerability, *e.g.* this provides a logical explanation for high levels of *HTT* CAG expansion seen  
480 in the liver yet the absence of obvious liver pathology [29]. A two-step model provides a framework for  
481 other repeat expansion diseases, and similarly can explain why the striatum is not the primary target of  
482 pathogenesis in SCA1 despite high levels of CAG expansion in that tissue [29]. We propose that this  
483 model can also be applied to XDP, predicting that somatic expansion of the CCCTCT repeat in certain  
484 cell types will elicit a toxic process(es) ultimately culminating in clinical disease. A full understanding of  
485 XDP pathogenesis will therefore entail dissecting both instability and toxicity components in specific cell  
486 types. Further, there is evidence for altered brain connectivity in XDP [12,14,15,54,55], providing added  
487 complexity such that repeat expansion in one cell-type may trigger functional deficits at the level of a

488 neuronal circuit. Notably our results provide evidence for a landscape of somatic events that include both  
489 repeat expansions and contractions, highlighting the importance of cell type-specific level resolution to  
490 understand relationships with disease processes. Currently, the nature of the toxic species is unclear, with  
491 reduced TAF1 levels and novel TAF1 isoforms being plausible candidates [19,20,22–25]. The inverse  
492 correlation of *TAF1* mRNA levels with CCCTCT repeat length seen in blood [26] is consistent with a role  
493 of TAF1 levels in a pathological process triggered by CCCTCT repeat expansion. Finally, while the  
494 identification of the *MSH3* and *PMS2* genes as XDP onset modifiers provides strong support for repeat  
495 expansion as the upstream driver of a toxic process(es), TAF1 itself has been implicated in promoting  
496 genome integrity [56–58]. Therefore, it is possible that altered TAF1 function in the disease process may  
497 further impact the DNA repair processes that underlie repeat instability, *e.g.* our data hint at differences in  
498 the instability of a non-disease-associated repeat (*LIPG* CCCTCT tract) in some tissues. Thus, genome-  
499 wide analyses of DNA instability/integrity in XDP patient brain would be of interest.

500         The prediction from our data is that that somatic CCCTCT repeat expansion contributes to length-  
501 dependent clinical measures, such as AAO. Of note, in the current dataset we find no difference in somatic  
502 expansion measured in blood between patients reporting symptom onset as either being predominantly  
503 dystonia or parkinsonism (Additional File 2: Fig.S1). This is consistent with the similar relationship  
504 between repeat length and AAO in these two patient subsets (Additional File 2: Fig.S1). Larger sample  
505 numbers will be needed to provide sufficient power for further tests of associations of repeat instability  
506 with clinical endpoints such as AAO. In addition, further studies will be needed to understand the  
507 relationship between repeat instability in blood and brain that will inform tests of association of instability  
508 with clinical measures.

509

## 510 **Conclusions**

511 These data demonstrate that the XDP CCCTCT repeat is unstable in somatic cells, exhibiting properties  
512 that are consistent with a role for somatic expansion in determining the timing of disease onset. Our data

513 suggest further avenues of investigation aimed at understanding the dynamics of this repeat mutation and  
514 relationship to pathogenesis.

515

## 516 **List of abbreviations**

517 XDP: X-linked dystonia-parkinsonism; SVA: SINE-VNTR-Alu; HD: Huntington's disease; TAF1:  
518 TATA-binding-protein (TBP)-associated factor-1; TBP: TATA-binding-protein; LIPG: Lipase G,  
519 Endothelial Type; MSNs: Medium-spiny neurons; AAO: Age at Onset; AAD: age at death; GWAS:  
520 genome-wide association; IRBs: MGH: Massachusetts General Hospital; IRB: Institutional Review  
521 Board; gDNA: Genomic DNA; CCXDP: Collaborative Center for XDP; DIG: digoxigenin; BA9: frontal  
522 cortex Brodmann area 9; SbN: substantia nigra; ION:inferior olivary nucleus; RN: red nucleus; DCN:  
523 deep cerebellar nuclei; STh: subthalamic nucleus; SP-PCR: small pool-PCR; HTT: huntingtin; MSH3:  
524 MutS homolog 3; PMS2: PMS1 homolog2, Mismatch repair system component; SCA1: Spinocerebellar  
525 ataxia type 1.

526

## 527 **Declarations**

### 528 **Ethics for approval and consent to participate**

529 All participants provided written informed consent, and the study was approved by Massachusetts  
530 General Hospital (Boston, MA, USA) and Jose R. Reyes Memorial Medical Center (Manila, Philippines)  
531 Institutional Review Boards (IRBs). Post-mortem brain tissue from XDP patients was obtained in  
532 collaboration with the Collaborative Center for XDP (CCXDP), at Massachusetts General Hospital  
533 (Boston, MA, USA), Makati Medical Center (Makati City, Philippines), and the Sunshine Care  
534 Foundation (Panay, Philippines). All procedures related to the collection, processing, and use of XDP  
535 patient post-mortem brain tissues were approved by IRBs at Makati Medical Center (Makati City,  
536 Philippines) and Massachusetts General Hospital (Boston, MA, USA)

537

538

539 **Consent for publication**

540 All authors consented to the publication of the manuscript.

541

542 **Availability of data and materials**

543 The datasets used and/or analyzed during the current study are available from the corresponding authors  
544 on reasonable request. Requests for tissue specimens may be directed to [xdp@partners.org](mailto:xdp@partners.org).

545

546 **Competing Interests**

547 V.C.W. is a scientific advisory board member of Triplet Therapeutics, Inc., a company  
548 developing new therapeutic approaches to address triplet repeat disorders such Huntington's  
549 disease and Myotonic Dystrophy. Her financial interests in Triplet Therapeutics were reviewed  
550 and are managed by Massachusetts General Hospital and Mass General Brigham in accordance  
551 with their conflict of interest policies. She is a scientific advisory board member of LoQus23  
552 Therapeutics, Ltd and has provided paid consulting services to Alnylam, Inc., Acadia  
553 Pharmaceuticals and Biogen, Inc. She has also received research support from Pfizer Inc.  
554 L.J.O. receives royalties from Athena Diagnostics.

555

556 **Funding**

557 This work is supported by funding from the CCXDP to VCW and LJO. RY is supported by the  
558 Massachusetts General Hospital Fund for Medical Discovery.

559

560 **Authors' contributions**

561 Sample acquisition: EBP, MGM, CF-C, MSV-A, GPL, NGG-B, JBBL, PJA, TM-B, GA, MLS, JKD, CG,  
562 NS, ELM, MCA, CCED, DCB; Sample processing: EBP, MGM, LNC; Data acquisition: LNC, TG,  
563 AMM; Data analysis: LNC, AMM, RY, KC, TG, LJO, VCW; Data interpretation: LNC, AMM, LJO,

564 VCW; Study conception: LJO, VCW; Design of the work: LNC, AMM, LJO, VCW; Manuscript drafting  
565 and revision: LNC, AMM, LJO, VCW.

566

## 567 **Acknowledgements**

568 We thank Marcy MacDonald, Jim Gusella and Jong-Min Lee for helpful input and discussion. We also  
569 thank XDP patients and their families for their invaluable contributions to this research.

570

571

## 572 **References**

- 573 1. Lee L V., Rivera C, Teleg RA, Dantes MB, Pasco PMD, Jamora RDG, et al. The unique  
574 phenomenology of sex-linked dystonia parkinsonism (XDP, DYT3, “Lubag”). *Int J Neurosci.*  
575 2011;121(SUPPL. 1).
- 576 2. Lee L V., Maranon E, Demaisip C, Peralta O, Borres-Icasiano R, Arancillo J, et al. The natural  
577 history of sex-linked recessive dystonia parkinsonism of Panay, Philippines (XDP)\*. Vol. 9,  
578 *Parkinsonism and Related Disorders.* 2002.
- 579 3. Lee L V., Kupke KG, Caballar-Gonzaga F, Hebron-Ortiz M, Müller U. The phenotype of the X-  
580 linked dystonia-parkinsonism syndrome: An assessment of 42 cases in the philippines. *Med*  
581 *(United States).* 1991;70(3).
- 582 4. Bragg DC, Mangkalaphiban K, Vaine CA, Kulkarni NJ, Shin D, Yadav R, et al. Disease onset in  
583 X-linked dystonia-parkinsonism correlates with expansion of a hexameric repeat within an SVA  
584 retrotransposon in TAF1. *Proc Natl Acad Sci U S A.* 2017;114(51).
- 585 5. Domingo A, Westenberger A, Lee L V., Brønne I, Liu T, Vater I, et al. New insights into the  
586 genetics of X-linked dystonia-parkinsonism (XDP, DYT3). *Eur J Hum Genet.* 2015;23(10).
- 587 6. Waters CH, Faust PL, Powers J, Vinters H, Moskowitz C, Nygaard T, et al. Neuropathology of  
588 lubag (x-linked dystonia parkinsonism). *Mov Disord.* 1993;8(3).
- 589 7. Goto S, Lee L V., Munoz EL, Tooyama I, Tamiya G, Makino S, et al. Functional anatomy of the

- 590 basal ganglia in X-linked recessive dystonia-parkinsonism. *Ann Neurol.* 2005;58(1).
- 591 8. Goto S, Kawarai T, Morigaki R, Okita S, Koizumi H, Nagahiro S, et al. Defects in the striatal  
592 neuropeptide y system in X-linked dystonia-parkinsonism. *Brain.* 2013;136(5).
- 593 9. Vonsattel JP, Myers RH, Stevens TJ, Ferrante RJ, Bird ED, Richardson EP. Neuropathological  
594 classification of huntington's disease. *J Neuropathol Exp Neurol.* 1985;44(6).
- 595 10. Arasaratnam CJ, Singh-Bains MK, Waldvogel HJ, Faull RLM. Neuroimaging and neuropathology  
596 studies of X-linked dystonia parkinsonism. Vol. 148, *Neurobiology of Disease.* 2021.
- 597 11. Petrozziello T, Mills AN, Vaine CA, Penney EB, Fernandez-Cerado C, Legarda GPA, et al.  
598 Neuroinflammation and histone H3 citrullination are increased in X-linked Dystonia Parkinsonism  
599 post-mortem prefrontal cortex. *Neurobiol Dis.* 2020;144.
- 600 12. Brüggemann N, Heldmann M, Klein C, Domingo A, Rasche D, Tronnier V, et al.  
601 Neuroanatomical changes extend beyond striatal atrophy in X-linked dystonia parkinsonism. *Park  
602 Relat Disord.* 2016;31.
- 603 13. Brüggemann N, Rosales RL, Waugh JL, Blood AJ, Domingo A, Heldmann M, et al. Striatal  
604 dysfunction in X-linked dystonia-parkinsonism is associated with disease progression. *Eur J  
605 Neurol.* 2017;24(5).
- 606 14. Blood AJ, Waugh JL, Münte TF, Heldmann M, Domingo A, Klein C, et al. Increased insula-  
607 putamen connectivity in X-linked dystonia-parkinsonism. *NeuroImage Clin.* 2018;17.
- 608 15. Hanssen H, Heldmann M, Prasuhn J, Tronnier V, Rasche D, Diesta CC, et al. Basal ganglia and  
609 cerebellar pathology in X-linked dystonia-parkinsonism. *Brain.* 2018;141(10).
- 610 16. Laabs BH, Klein C, Pozojevic J, Domingo A, Brüggemann N, Grütz K, et al. Identifying genetic  
611 modifiers of age-associated penetrance in X-linked dystonia-parkinsonism. *Nat Commun.*  
612 2021;12(1).
- 613 17. Németh AH, Nolte D, Dunne E, Niemann S, Kostrzewa M, Peters U, et al. Refined linkage  
614 disequilibrium and physical mapping of the gene locus for X-linked Dystonia-Parkinsonism  
615 (DYT3). *Genomics.* 1999;60(3).



- 616 18. Nolte D, Niemann S, Müller U. Specific sequence changes in multiple transcript system DYT3 are  
617 associated with X-linked dystonia parkinsonism. *Proc Natl Acad Sci U S A*. 2003;100(18).
- 618 19. Makino S, Kaji R, Ando S, Tomizawa M, Yasuno K, Goto S, et al. Reduced neuron-specific  
619 expression of the TAF1 gene is associated with X-linked dystonia-parkinsonism. *Am J Hum*  
620 *Genet*. 2007;80(3).
- 621 20. Aneichyk T, Hendriks WT, Yadav R, Shin D, Gao D, Vaine CA, et al. Dissecting the Causal  
622 Mechanism of X-Linked Dystonia-Parkinsonism by Integrating Genome and Transcriptome  
623 Assembly. *Cell*. 2018;172(5).
- 624 21. Hancks DC, Kazazian HH. SVA retrotransposons: Evolution and genetic instability. Vol. 20,  
625 *Seminars in Cancer Biology*. 2010.
- 626 22. Ito N, Hendriks WT, Dhakal J, Vaine CA, Liu C, Shin D, et al. Decreased N-TAF1 expression in  
627 X-linked dystonia-parkinsonism patient-specific neural stem cells. *DMM Dis Model Mech*.  
628 2016;9(4).
- 629 23. Rakovic A, Domingo A, Grütz K, Kulikovskaja L, Capetian P, Cowley SA, et al. Genome editing  
630 in induced pluripotent stem cells rescues TAF1 levels in X-linked dystonia-parkinsonism. *Mov*  
631 *Disord*. 2018;33(7).
- 632 24. Domingo A, Amar D, Grütz K, Lee L V., Rosales R, Brüggemann N, et al. Evidence of TAF1  
633 dysfunction in peripheral models of X-linked dystonia-parkinsonism. *Cell Mol Life Sci*.  
634 2016;73(16).
- 635 25. Al Ali J, Vaine CA, Shah S, Champion L, Hakoum A, Supnet ML, et al. TAF1 Transcripts and  
636 Neurofilament Light Chain as Biomarkers for X-linked Dystonia-Parkinsonism. *Mov Disord*.  
637 2021;36(1).
- 638 26. Westenberger A, Reyes CJ, Saranza G, Dobricic V, Hanssen H, Domingo A, et al. A  
639 hexanucleotide repeat modifies expressivity of X-linked dystonia parkinsonism. *Ann Neurol*.  
640 2019;85(6).
- 641 27. Depienne C, Mandel JL. 30 years of repeat expansion disorders: What have we learned and what

- 642 are the remaining challenges? Vol. 108, American Journal of Human Genetics. 2021.
- 643 28. Monckton DG. The Contribution of Somatic Expansion of the CAG Repeat to Symptomatic  
644 Development in Huntington's Disease: A Historical Perspective. Vol. 10, Journal of Huntington's  
645 Disease. 2021.
- 646 29. Pinto RM, Arning L, Giordano J V., Razghandi P, Andrew MA, Gillis T, et al. Patterns of CAG  
647 repeat instability in the central nervous system and periphery in Huntington's disease and in  
648 spinocerebellar ataxia type 1. *Hum Mol Genet.* 2020;29(15).
- 649 30. Swami M, Hendricks AE, Gillis T, Massood T, Mysore J, Myers RH, et al. Somatic expansion of  
650 the Huntington's disease CAG repeat in the brain is associated with an earlier age of disease onset.  
651 *Hum Mol Genet.* 2009;18(16).
- 652 31. Genetic Modifiers of Huntington's Disease (GeM-HD) Consortium. CAG Repeat Not  
653 Polyglutamine Length Determines Timing of Huntington's Disease Onset. *Cell.* 2019;178(4).
- 654 32. Hong EP, MacDonald ME, Wheeler VC, Jones L, Holmans P, Orth M, et al. Huntington's Disease  
655 Pathogenesis: Two Sequential Components. Vol. 10, Journal of Huntington's Disease. 2021.
- 656 33. Cumming SA, Hamilton MJ, Robb Y, Gregory H, McWilliam C, Cooper A, et al. De novo repeat  
657 interruptions are associated with reduced somatic instability and mild or absent clinical features in  
658 myotonic dystrophy type 1. *Eur J Hum Genet.* 2018;26(11).
- 659 34. Zhao X, Kumari D, Miller CJ, Kim GY, Hayward B, Vitalo AG, et al. Modifiers of Somatic  
660 Repeat Instability in Mouse Models of Friedreich Ataxia and the Fragile X-Related Disorders:  
661 Implications for the Mechanism of Somatic Expansion in Huntington's Disease. Vol. 10, Journal  
662 of Huntington's Disease. 2021.
- 663 35. Bettencourt C, Hensman-Moss D, Flower M, Wiethoff S, Brice A, Goizet C, et al. DNA repair  
664 pathways underlie a common genetic mechanism modulating onset in polyglutamine diseases.  
665 *Ann Neurol.* 2016;79(6).
- 666 36. Morales F, Vásquez M, Corrales E, Vindas-Smith R, Santamaría-Ulloa C, Zhang B, et al.  
667 Longitudinal increases in somatic mosaicism of the expanded CTG repeat in myotonic dystrophy

- 668 type 1 are associated with variation in age-at-onset. *Hum Mol Genet.* 2020;29(15).
- 669 37. Ciosi M, Maxwell A, Cumming SA, Hensman Moss DJ, Alshammari AM, Flower MD, et al. A  
670 genetic association study of glutamine-encoding DNA sequence structures, somatic CAG  
671 expansion, and DNA repair gene variants, with Huntington disease clinical outcomes.  
672 *EBioMedicine.* 2019;48.
- 673 38. Gomes-Pereira M, Fortune MT, Ingram L, McAbney JP, Monckton DG. Pms2 is a genetic  
674 enhancer of trinucleotide CAG-CTG repeat somatic mosaicism: Implications for the mechanism of  
675 triplet repeat expansion. *Hum Mol Genet.* 2004;13(16).
- 676 39. Dragileva E, Hendricks A, Teed A, Gillis T, Lopez ET, Friedberg EC, et al. Intergenerational and  
677 striatal CAG repeat instability in Huntington's disease knock-in mice involve different DNA  
678 repair genes. *Neurobiol Dis.* 2009;33(1).
- 679 40. Moss DJH, Tabrizi SJ, Mead S, Lo K, Pardiñas AF, Holmans P, et al. Identification of genetic  
680 variants associated with Huntington's disease progression: a genome-wide association study.  
681 *Lancet Neurol.* 2017;16(9).
- 682 41. Reyes CJ, Laabs B-H, Schaake S, Lüth T, Ardicoglu R, Rakovic A, et al. Brain Regional  
683 Differences in Hexanucleotide Repeat Length in X-Linked Dystonia-Parkinsonism Using  
684 Nanopore Sequencing. *Neurol Genet.* 2021;7(4).
- 685 42. Albanese A, Sorbo F Del, Comella C, Jinnah HA, Mink JW, Post B, et al. Dystonia rating scales:  
686 Critique and recommendations. Vol. 28, *Movement Disorders.* 2013.
- 687 43. Shiihashi G, Ito D, Yagi T, Nihei Y, Ebine T, Suzuki N. Mislocated FUS is sufficient for gain-of-  
688 toxic-function amyotrophic lateral sclerosis phenotypes in mice. *Brain.* 2016;
- 689 44. Fernandez-Cerado C, Legarda GP, Velasco-Andrada MS, Aguil A, Ganza-Bautista NG, Lagarde  
690 JBB, et al. Promise and challenges of dystonia brain banking: establishing a human tissue  
691 repository for studies of X-Linked Dystonia-Parkinsonism. *J Neural Transm.* 2021;128(4).
- 692 45. Lee JM, Zhang J, Su AI, Walker JR, Wiltshire T, Kang K, et al. A novel approach to investigate  
693 tissue-specific trinucleotide repeat instability. *BMC Syst Biol.* 2010;4.

- 694 46. Gomes-Pereira M, Bidichandani SI, Monckton DG. Analysis of unstable triplet repeats using  
695 small-pool polymerase chain reaction. *Methods Mol Biol.* 2004;277.
- 696 47. Bragg DC, Sharma N, Ozelius LJ. X-Linked Dystonia-Parkinsonism: Recent advances. Vol. 32,  
697 *Current Opinion in Neurology.* 2019.
- 698 48. Keum JW, Shin A, Gillis T, Mysore JS, Abu Elneel K, Lucente D, et al. The HTT CAG-  
699 Expansion Mutation Determines Age at Death but Not Disease Duration in Huntington Disease.  
700 *Am J Hum Genet.* 2016;98(2).
- 701 49. Langbehn DR. Longer CAG repeat length is associated with shorter survival after disease onset in  
702 Huntington disease. *Am J Hum Genet* [Internet]. 2022 Jan 6 [cited 2022 Jan 19];109(1):172–9.  
703 Available from: <https://linkinghub.elsevier.com/retrieve/pii/S0002929721004572>
- 704 50. Takano H, Onodera O, Takahashi H, Igarashi S, Yamada M, Oyake M, et al. Somatic mosaicism  
705 of expanded CAG repeats in brains of patients with dentatorubral-pallidoluysian atrophy: Cellular  
706 population-dependent dynamics of mitotic instability. *Am J Hum Genet.* 1996;58(6).
- 707 51. Cancel G, Gourfinkel-An I, Stevanin G, Didierjean O, Abbas N, Hirsch E, et al. Somatic  
708 mosaicism of the CAG repeat expansion in spinocerebellar ataxia type 3/Machado-Joseph disease.  
709 *Hum Mutat.* 1998;11(1).
- 710 52. Sun JH, Zhou L, Emerson DJ, Phyo SA, Titus KR, Gong W, et al. Disease-Associated Short  
711 Tandem Repeats Co-localize with Chromatin Domain Boundaries. *Cell.* 2018;175(1).
- 712 53. Lin Y, Dion V, Wilson JH. Transcription promotes contraction of CAG repeat tracts in human  
713 cells. *Nat Struct Mol Biol.* 2006;13(2).
- 714 54. Brüggemann N, Domingo A, Rasche D, Moll CKE, Rosales RL, Jamora RDG, et al. Association  
715 of Pallidal Neurostimulation and Outcome Predictors with X-linked Dystonia Parkinsonism.  
716 *JAMA Neurol.* 2019;76(2).
- 717 55. Sprenger A, Hanssen H, Hagedorn I, Prasuhn J, Rosales RL, Jamora RDG, et al. Eye movement  
718 deficits in X-linked dystonia-parkinsonism are related to striatal degeneration. *Park Relat Disord.*  
719 2019;61.

- 720 56. Kim JJ, Lee SY, Gong F, Battenhouse AM, Boutz DR, Bashyal A, et al. Systematic bromodomain  
721 protein screens identify homologous recombination and R-loop suppression pathways involved in  
722 genome integrity. *Genes Dev.* 2019;33(23–24).
- 723 57. Peng H, Zhang S, Peng Y, Zhu S, Zhao X, Zhao X, et al. Yeast Bromodomain Factor 1 and Its  
724 Human Homolog TAF1 Play Conserved Roles in Promoting Homologous Recombination. *Adv*  
725 *Sci.* 2021;8(15).
- 726 58. Buchmann AM, Skaar JR, DeCaprio JA. Activation of a DNA Damage Checkpoint Response in a  
727 TAF1-Defective Cell Line. *Mol Cell Biol.* 2004;24(12).
- 728
- 729
- 730
- 731
- 732
- 733

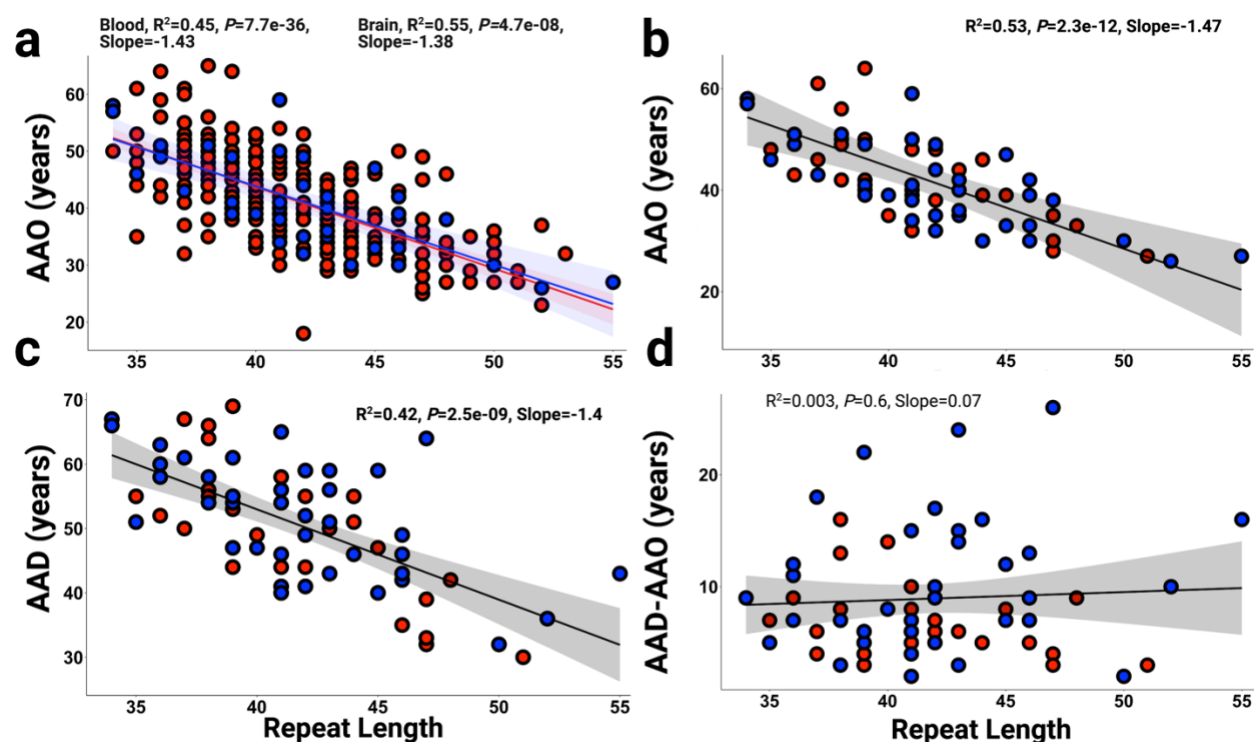

**Fig. 1** Length of the CCCTCT repeat correlates with AAO and AAD in male XDP patients.

(a) Inverse correlations between CCCTCT repeat length in blood (red dots and line, n=266) and brain (blue dots and line, n=40) with AAO. **b** Inverse correlation between CCCTCT repeat length determined in a subgroup of blood and brain samples from deceased XDP patients (blood n=28; brain n=40) and AAO. **c** Inverse correlation between CCCTCT repeat length determined in a subgroup of blood and brain samples from deceased XDP patients (blood n=28; brain n=40) and AAD. **d** Length of the CCCTCT repeat determined in the subgroup of blood and brain samples from deceased XDP patients (blood n=28; brain n=40) is not correlated with disease duration (AAD-AAO, n=68). AAO, age at onset; AAD, age at death. Brain repeat lengths were determined in cerebellum (n=39) or occipital cortex (n=1). In a-d, blood (red dots) and brain samples (blue dots).

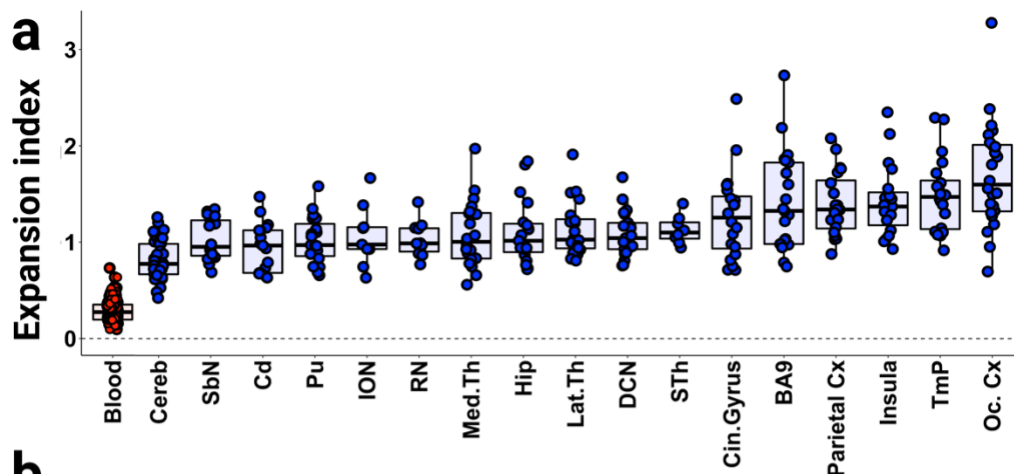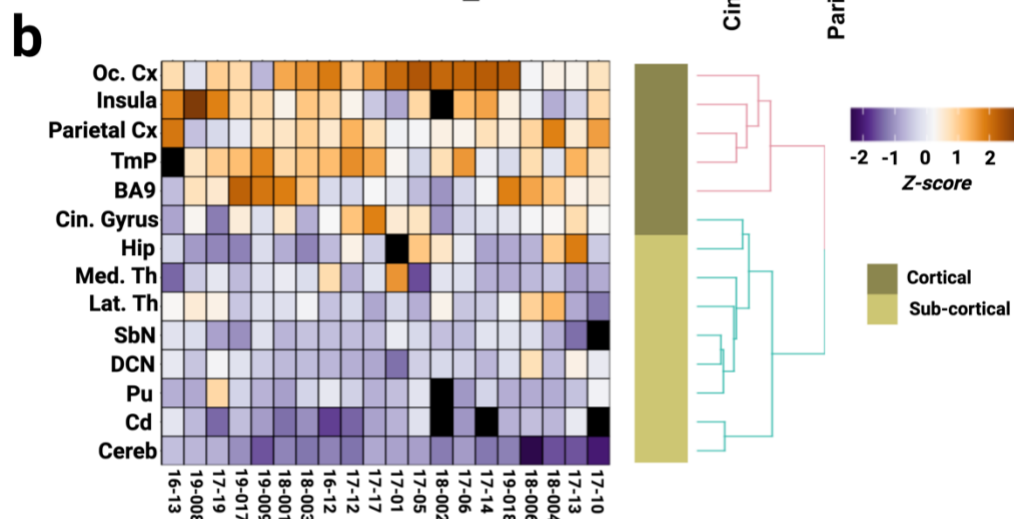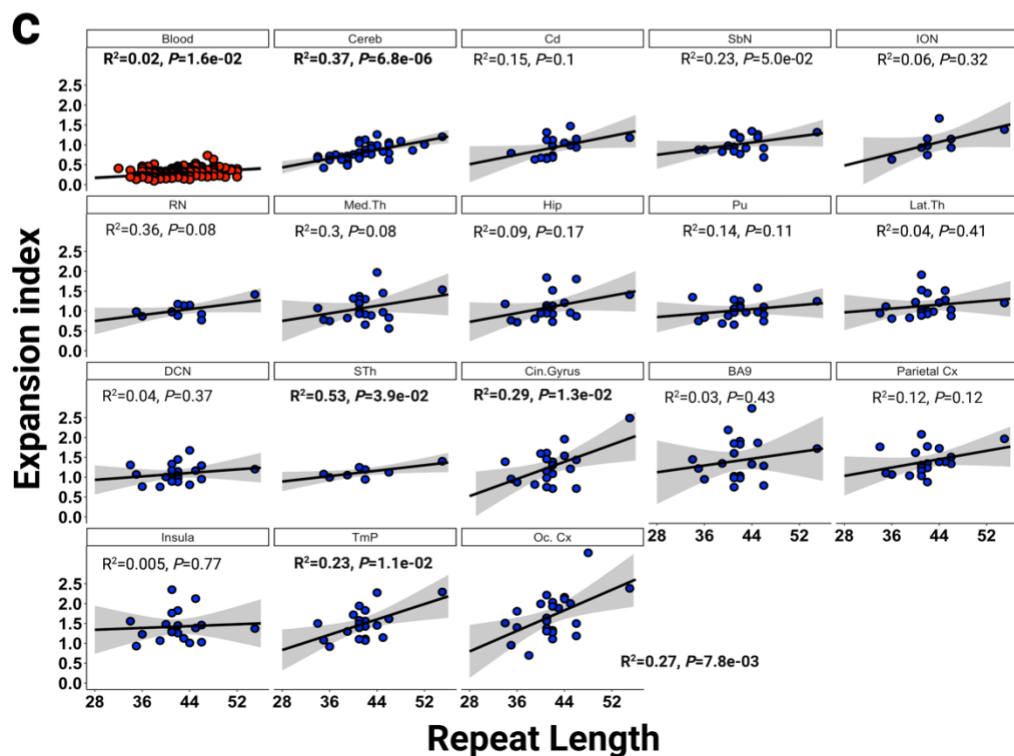

**Fig. 2 XDP CCCTCT repeat expansion index in blood and brain regions.**

**a** Distribution of expansion indices ranked by median values in blood and brain regions. Box-whisker plots show median  $\pm$  interquartile range (IQR) and dots show values in individual patient samples.

**b** Heatmap of expansion indices values in different individuals (rows), scaled (z-score) across brain tissues (columns). To avoid poor normalization during scaling, brain regions with fewer than 12 measures and individuals with fewer than 6 tissue samples were excluded (Additional File 2: Fig. S4). Brain regions with no measurement are represented as black boxes. **c** Linear regression analyses showing relationships between CCCTCT repeat length and expansion index in each tissue. The regression equations shown in bold font highlight those tissues (blood, cerebellum, subthalamic nuclei, cingulate gyrus, temporal pole, occipital cortex) showing a significant association of expansion index with repeat length. Grey shaded areas show 95% confidence interval. Blood (n=164), Cereb=cerebellum (n=40), Cd=caudate (n=17), SbN=substantia nigra (n=19), ION = inferior olivary nucleus (n=9), RN = red nucleus (n=11), Med.Th = medial thalamus (n=20), Hip = hippocampus (n=19), Pu = putamen (n=19), Lat.Th = lateral thalamus (n=20), DCN = deep cerebellar nuclei (n=21), STh = subthalamic nucleus (n=8), Cin.Gyrus = cingulate gyrus (n=20), BA9 = frontal cortex Brodmann area 9 (n=21), Parietal Cx = parietal cortex (n=20), Insula = insular cortex (n=19), TmP = temporal pole (n=20), Oc. Cx = occipital cortex (n=24).



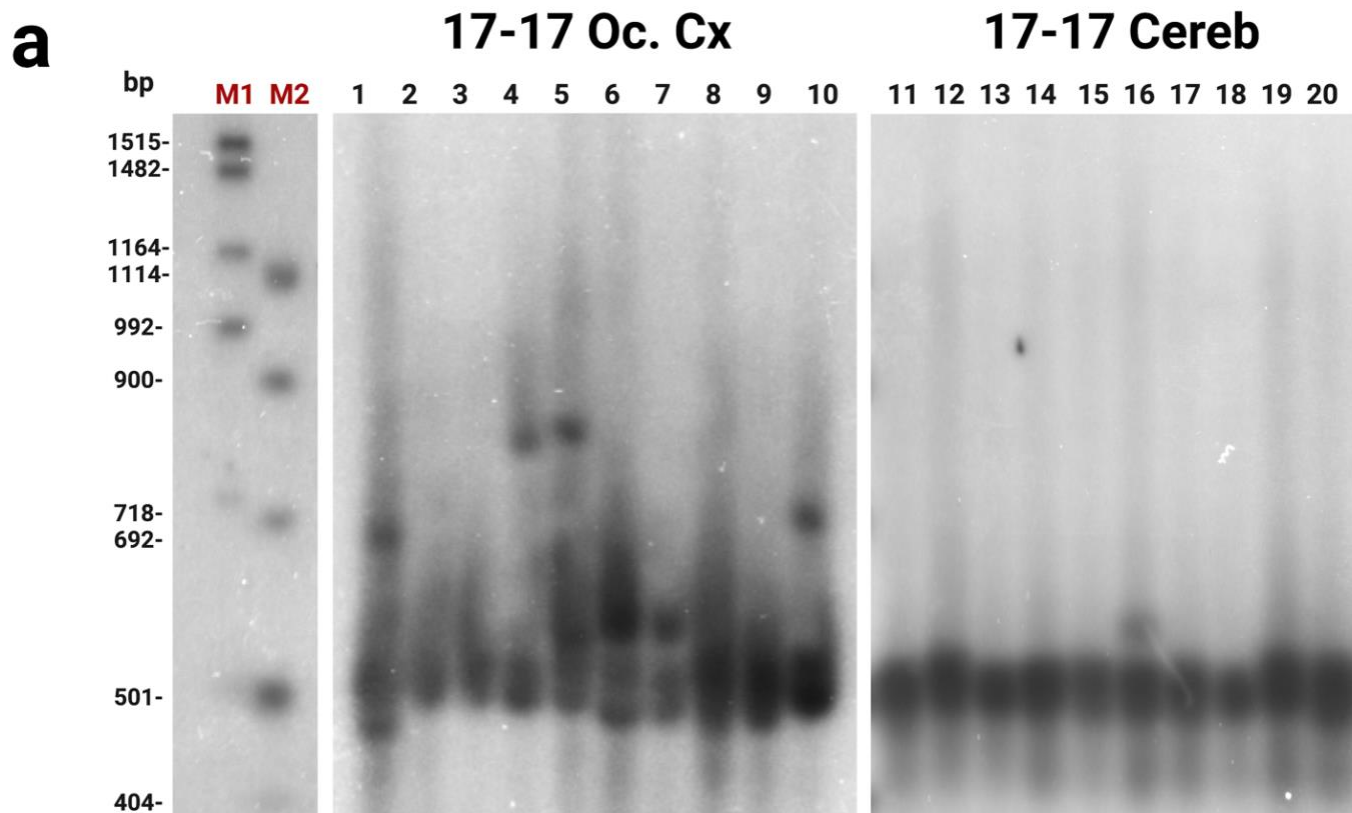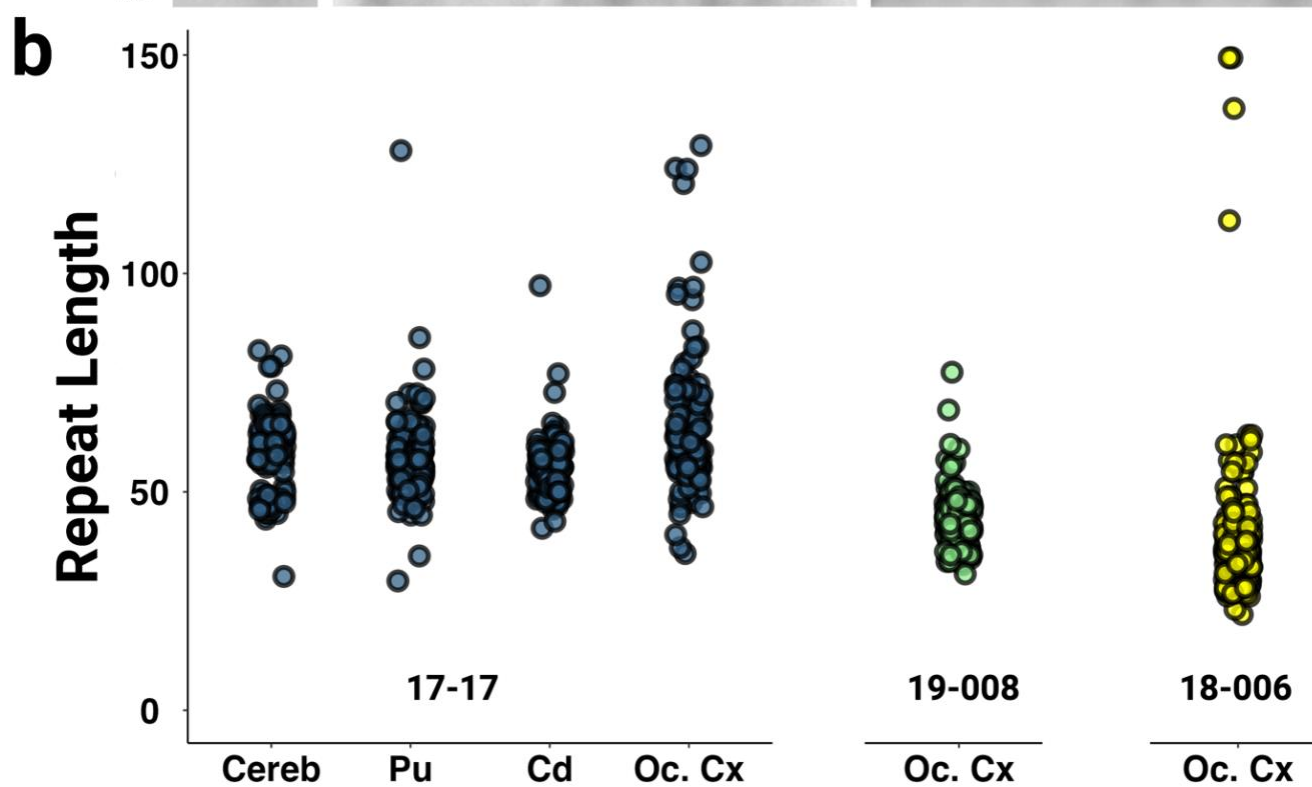

**Fig. 3 Southern blot images and estimated repeat lengths.**

**a** Representative Southern blot images for 17-17 occipital cortex (Oc. Cx) (lanes 1-10) and cerebellum (Cereb) (lanes 11-20) illustrating the varying degree of instability across brain regions. Each lane represents PCR amplification of ~30 g.e. M1 and M2 size markers are DIG VII and VIII, respectively and are shown with the corresponding base pair lengths. **b** Estimated CCCTCT repeat lengths based on distance migrated relative to the M1 and M2 markers. Repeat size data for each sample are obtained from 36 replicates (individual lanes), each with ~30 g.e. input DNA amount.

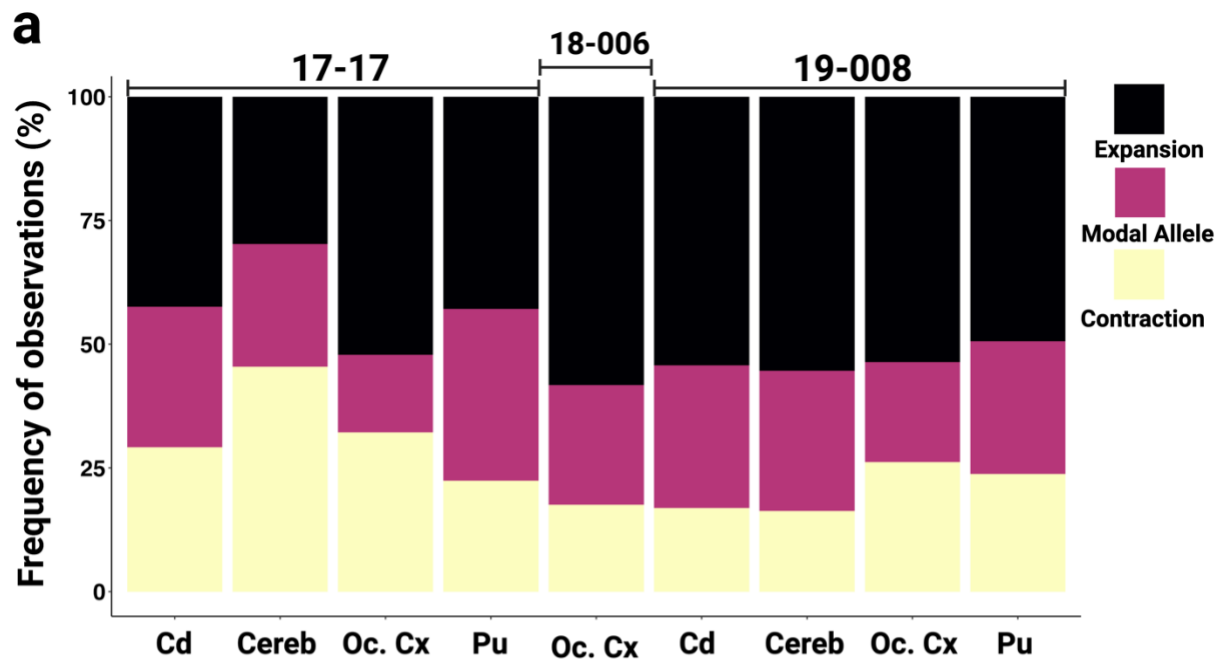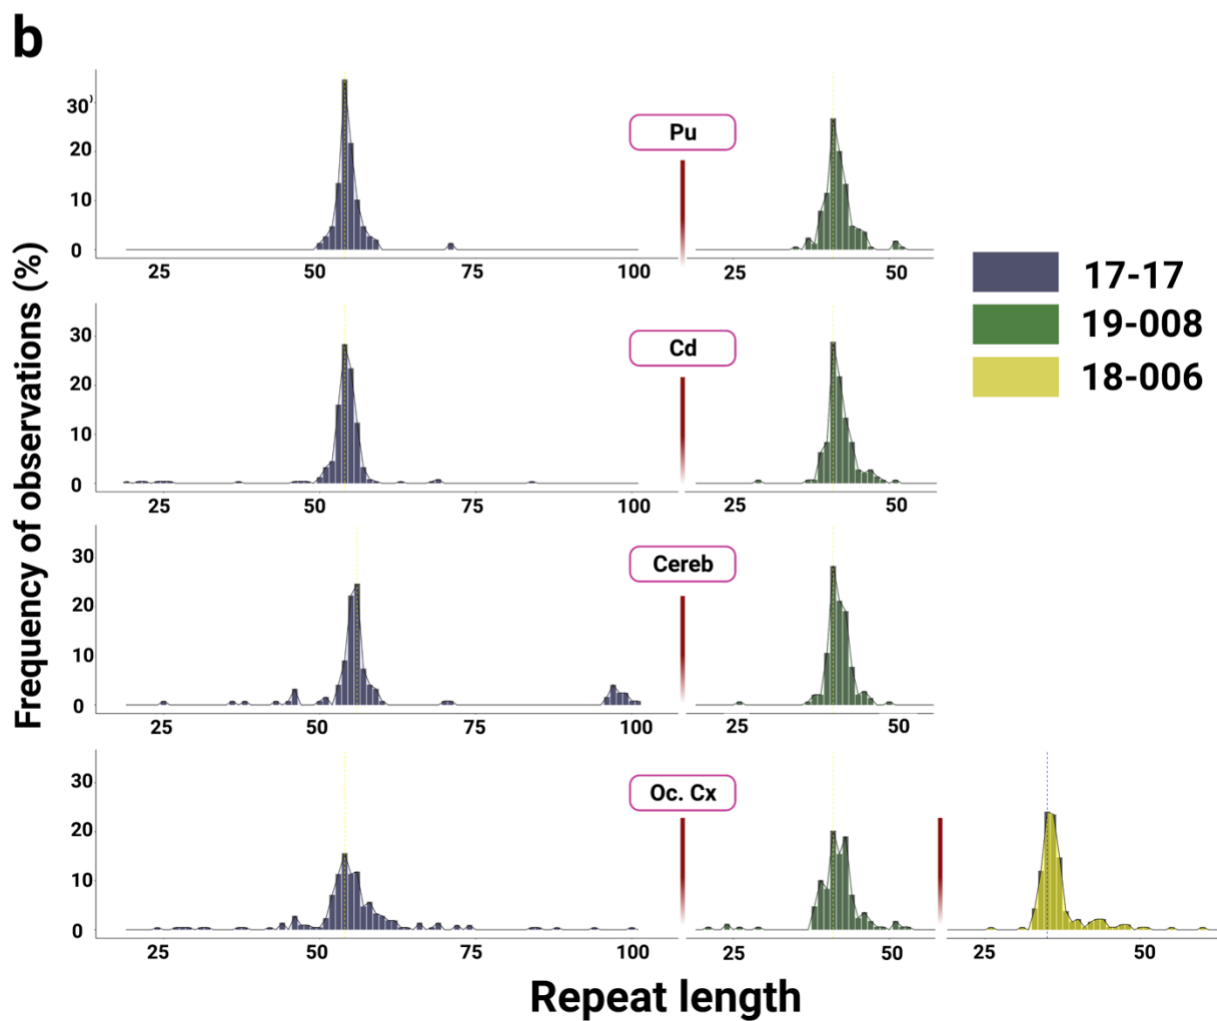

**Fig. 4 XDP CCCTCT repeat length distributions in brain regions.**

Repeat lengths were determined by fragment sizing of amplicons obtained in single molecule input PCRs in four tissues (Pu=putamen, Cd=caudate, Cereb= cerebellum, Oc. Cx =occipital cortex) across three patients. **a** Percentages of expansions and contractions compared to the modal allele. **b** Histograms of repeat length frequencies. Data in **a** and **b** were derived from 121-243 single amplifiable molecules for each sample. Refer to Table 1 for summary data derived from these analyses.

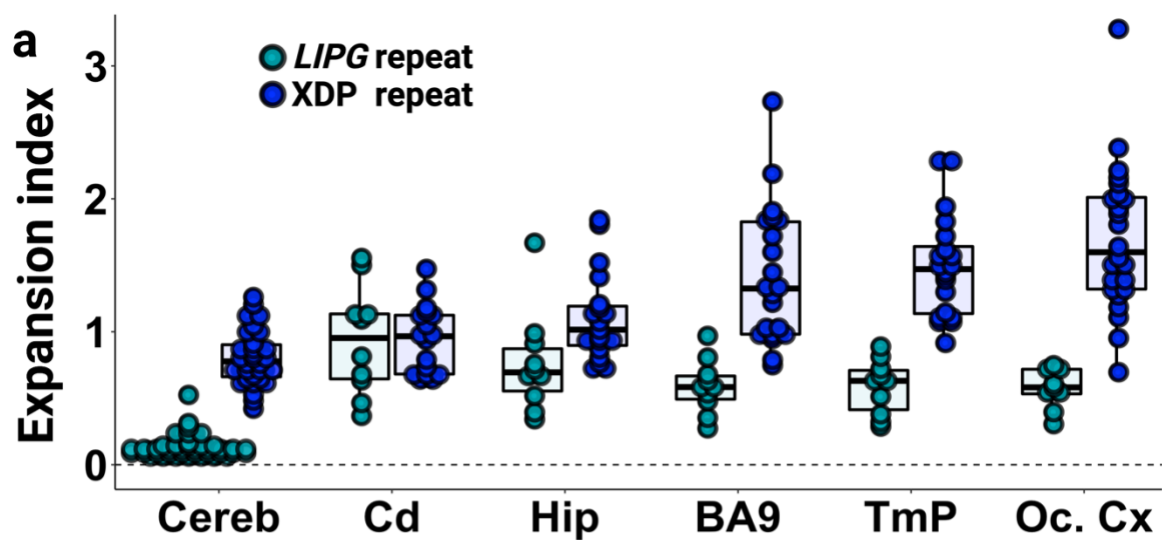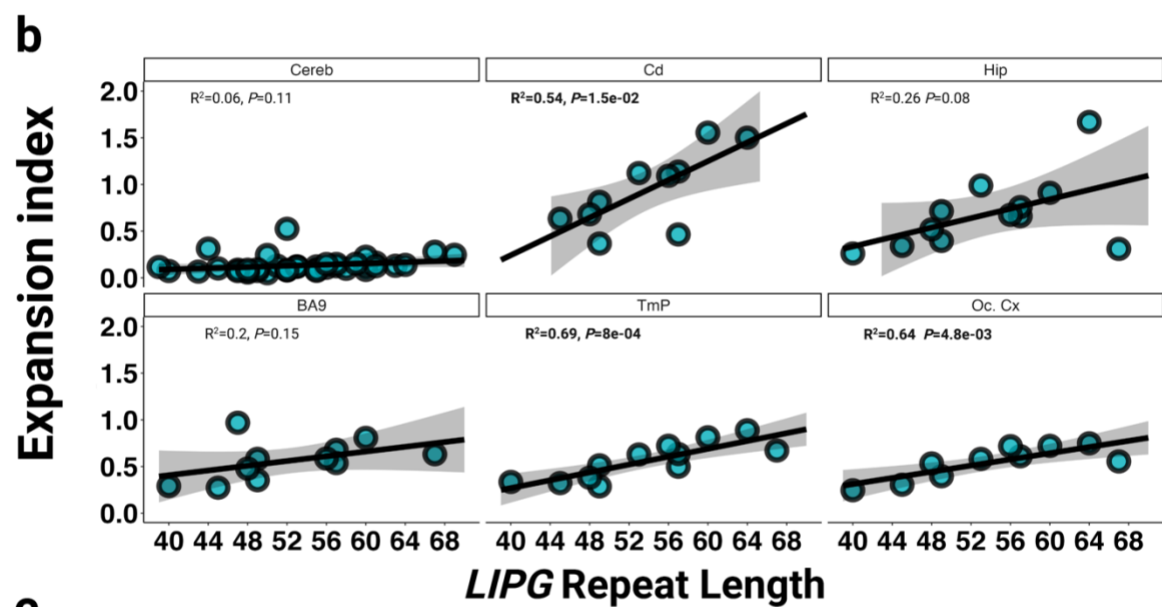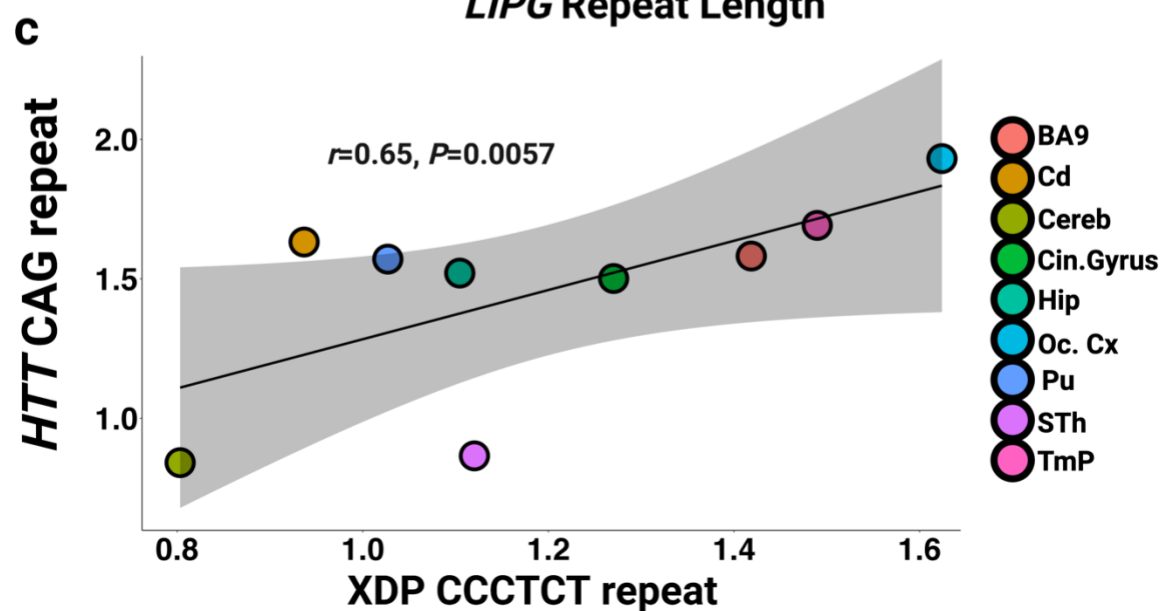

**Fig. 5 Expansion of the CCCTCT *LIPG* repeat and *HTT* CAG repeat in comparison to the XDP CCCTCT repeat.**

**a** Distribution of expansion indices of *LIPG* and XDP CCCTCT repeats in XDP postmortem brain tissues. Box-whisker plots show median  $\pm$  IQR and dots show values for individual alleles. XDP repeat: data are the same as in Fig.2. Refer to Additional File1: Table S3 for sample numbers for each brain region. *LIPG* repeat: Cereb=Cerebellum (n=23 individuals, 40 alleles), Cd=Caudate (n=5 patients, 10 alleles), Hip = Hippocampus (n= 6 patients, 10 alleles), BA9 = frontal cortex Brodmann area 9 (n= 6 patients, 11 alleles), TmP = Temporal pole (n=6 patients, 12 alleles), Oc. Cx = Occipital cortex (n=5 patients, 10 alleles). Note that some alleles that failed QC were excluded. **b** Linear regression analyses showing relationships between *LIPG* CCCCTC repeat length and expansion index in each brain region. The regression equations shown in bold font highlight those tissues (caudate, BA9, temporal pole and occipital cortex) showing a significant association of expansion index with repeat length. Grey shaded areas show 95% confidence interval. **c** Correlation of mean *HTT* CAG expansion index in three HD individuals (Materials and Methods) and mean XDP CCCTCT expansion indices. Refer to Additional File1: Table S3 for sample numbers for each brain region for XDP.

1 **Table 1. Summary of XDP CCCTCT repeat sizing and instability analyses**

2

| Sample                  | Repeat length<br>(standard genotyping) | Expansion index | Small pool-PCR<br>Southern blot<br>Highest/lowest repeat lengths | Single molecule input small pool-PCR |                    |                     |                               |
|-------------------------|----------------------------------------|-----------------|------------------------------------------------------------------|--------------------------------------|--------------------|---------------------|-------------------------------|
|                         |                                        |                 |                                                                  | Number of alleles sampled            | Mean repeat length | Modal repeat length | Highest/lowest repeat lengths |
| 17-17 Cerebellum        | 55                                     | 1.205           | 82/31                                                            | 121                                  | 60                 | 56                  | 101/25                        |
| 17-17 Occipital Cortex  | 54                                     | 2.383           | 129/36                                                           | 211                                  | 55                 | 54                  | 100/24                        |
| 17-17 Putamen           | 54                                     | 1.247           | 128/30                                                           | 147                                  | 55                 | 54                  | 71/50                         |
| 17-17 Caudate           | 54                                     | 1.1809          | 97/42                                                            | 243                                  | 54                 | 54                  | 84/19                         |
| 18-006 Occipital Cortex | 35                                     | 0.9524          | 149/22                                                           | 182                                  | 37                 | 35                  | 60/26                         |
| 19-008 Occipital Cortex | 41                                     | 1.305           | 77/31                                                            | 168                                  | 42                 | 41                  | 53/21                         |
| 19-008 Cerebellum       | 41                                     | 1.111           |                                                                  | 141                                  | 42                 | 41                  | 50/26                         |
| 19-008 Caudate          | 41                                     | 1.124           |                                                                  | 142                                  | 42                 | 41                  | 49/37                         |
| 19-008 Putamen          | 41                                     | 1.061           |                                                                  | 164                                  | 42                 | 41                  | 47/35                         |

3
